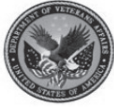

**VA** | Defining  
**HEALTH CARE** | **EXCELLENCE**  
in the 21st Century

## Serve Those Who Served

Caring for our nation's Veterans is among the most noble of callings.

How would you like to become a part of a team providing compassionate care to Veterans?

At the Wilkes-Barre VA Medical Center, you will use your skills and experience in a personally and professionally rewarding career serving Veterans. As more Veterans return from the Iraq and Afghanistan Wars, the need increases for talented mental health professionals.

### ADDICTION PSYCHIATRIST

The Wilkes-Barre VA Medical Center is now hiring an Addiction Psychiatrist for our Mental Health Service. Candidate should possess Board Certification/Board Eligible Fellowship in Addiction Psychiatry. Experience in Outpatient and Residential addiction treatments; Detox treatment; Opiate Addictions (e.g. suboxone treatment).

#### Apply today!

- Interdisciplinary care team model of practice
- Practice based on patient care needs, not insurance regulations
- Diverse professional opportunities: clinical, leadership, education, research and policy development
- Competitive salary
- 13 to 26 days annual paid vacation
- 13 sick days and 10 holidays
- One license/50 states
- Generous health and retirement benefits
- Exceptional education support opportunities (subject to funding availability)
- Relocation Expenses authorized

The Wilkes-Barre VA Medical Center is one of 152 VA medical centers nationwide. The VA health care system is the largest, most technologically advanced integrated health care system in the nation. Wilkes-Barre VA Medical Center is located near the scenic Pocono Mountains of Northeastern Pennsylvania and is within a two-hour drive of New York City and Philadelphia.

Interested applicants must submit the following information to the address listed below: Application for Physicians, Dentists, Podiatrists, Optometrists and Chiropractors, VA Form 10-2850; Declaration for Federal Employment, OF-306 and Resume/Curriculum Vitae. Both forms can be found on the USA Jobs Website at [www.usajobs.gov](http://www.usajobs.gov).

For additional information please call (570) 824-3521, EXTENSION 7209.

Please mail your complete application package to:

**Department of Veterans Affairs Medical Center (05/pj)**  
**1111 East End Boulevard, Wilkes-Barre, PA 18711-0026**

VA IS AN EQUAL OPPORTUNITY EMPLOYER

## There's So Much More to JNCN Than Meets the Page!

Visit *The Journal of Neuropsychiatry and Clinical Neurosciences'* website on PsychiatryOnline for the following features!

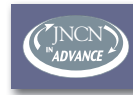

### JNCN in Advance

The very latest research advances!

**At JNCN in Advance, you can discover the following before their appearance in print:**

#### Gilles de la Tourette Syndrome and Disruptive Behavior Disorders: Prevalence, Associations, and Explanation of the Relationships

Gilles de la Tourette syndrome and conduct disorder (CD) are both heterogeneous childhood onset conditions, and although patients with CD have been described in Gilles de la Tourette syndrome cohorts, little is known about the etiology of CD in Gilles de la Tourette syndrome or of the interrelationships. A cohort of 578 consecutive patients with Gilles de la Tourette syndrome was assessed using standard assessment protocols.

#### Community Cognitive Screening Using the Self-Administered Gerocognitive Examination (SAGE)

This study investigated the functionality of the Self-Administered Gerocognitive Examination (SAGE) for cognitive screening in community settings and examined its characteristics as a cognitive screening assessment tool. Community cognitive screening using SAGE was found to be feasible and efficient in diverse settings with both small and large groups.

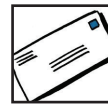

### Letters to the Editor

Full text of all letters appears online with each issue

Accompanying this month's issue include:

- Successful Treatment of Dopamine Dysregulation Syndrome With Valproic Acid
- Russell's Sign in Persistent Delusional Disorder: A Case Report
- Lacosamide-Induced Tactile Hallucinations in a Patient With Complex Partial Seizures
- A Case of Acute-Onset Partial Kluver-Bucy Syndrome in a Patient With a History of Traumatic Brain Injury
- Psychotic Episode in a Patient With Alzheimer's Dementia While Shifting From the Oral to Patch Form of Rivastigmine

View all letters at <http://neuro.psychiatryonline.org>

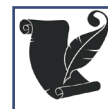

### Revisit the field's rich history!

**25 years ago this month: Early Neuropsychological Dysfunction Caused by Human Immunodeficiency Virus**

The human immunodeficiency virus (HIV) directly affects the CNS and often causes cognitive, motor, and behavioral changes and eventually a dementia prior to death. The authors reviewed the available literature, discussed methodological problems, and made recommendations for evaluation and treatment when early HIV-induced mental changes are suspected.

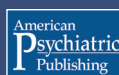

<http://neuro.psychiatryonline.org>

www.appi.org • 1-800-368-5777

Fax: 703-907-1091 • Email: [appi@psych.org](mailto:appi@psych.org)
