# THE JOURNAL OF NEUROPSYCHIATRY and Clinical Neurosciences

The Official Journal of the American Neuropsychiatric Association

## In this issue:

- Psychotherapy for PTSD: Neuroimaging of Recovery Processes
- Toward an Understanding of Decision Making in Severe Mental Illness
- Kissing or “Osculation” in Frontotemporal Dementia
- Association Between Clinical Measures and Florbetapir F18 PET Neuroimaging in Mild or Moderate Alzheimer’s Disease Dementia
- Skin Conductance Levels May Reflect Emotional Blunting in Behavioral Variant Frontotemporal Dementia

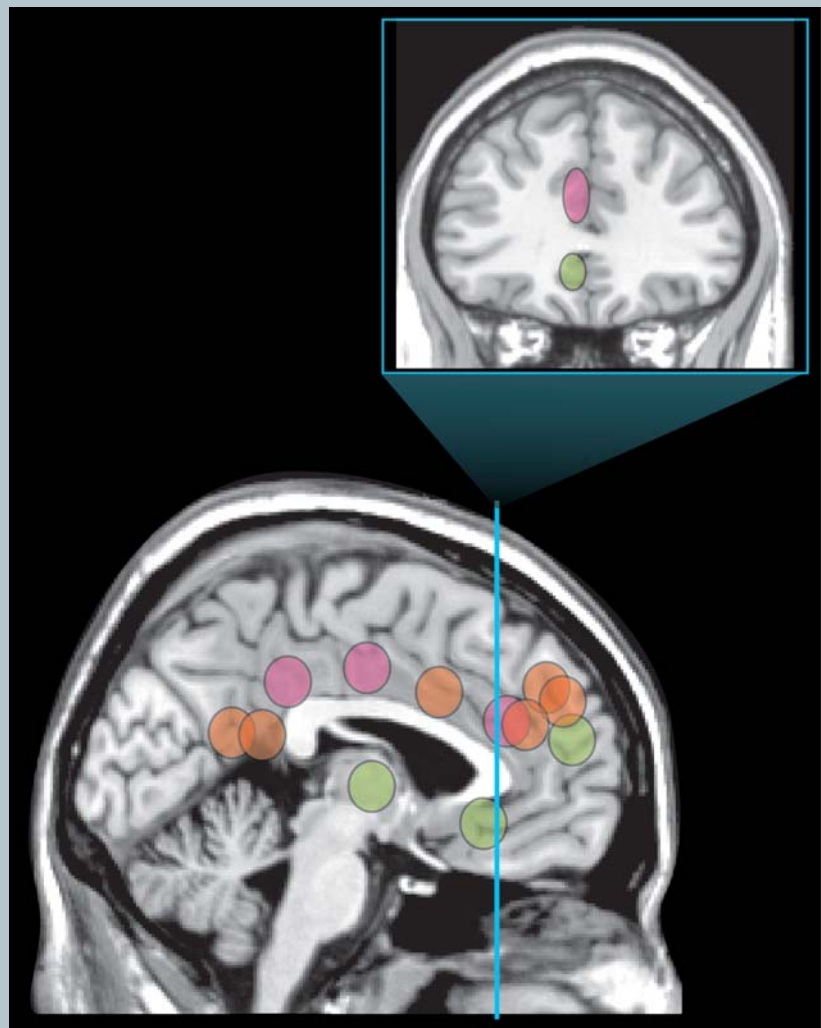

Source: https://psychiatryonline.org/doi/suppl/10.1176/jnp.2014.26.issue-3/suppl_file/cover.pdf
